# Supplementary material for: Impact of a Teaching Kitchen Curriculum for Health Professional Trainees in Nutrition Knowledge, Confidence, and Skills to Advance Obesity Prevention and Management in Clinical Practice
Source: MDPI journal article supplement (doi:10.3390/nu15194240), 2023-09-30
Supplement: s1 [file s1]

Table S1: Survey about “Provider’s Role in Managing Obesity,” “Confidence in Obesity Knowledge,” and “Confidence in Counseling Families about Obesity”

**“Provider’s Role in Managing Obesity”**

| <b>How much do you agree or disagree with the following statements:</b>                                                                                      | <b>Strongly Agree</b> | <b>Agree</b> | <b>Neither Agree nor Disagree</b> | <b>Disagree</b> | <b>Strongly Disagree</b> |
|--------------------------------------------------------------------------------------------------------------------------------------------------------------|-----------------------|--------------|-----------------------------------|-----------------|--------------------------|
| A. It is the primary care provider’s role to identify obesity in children.                                                                                   | 5                     | 4            | 3                                 | 2               | 1                        |
| B. It is the primary care provider’s role to provide dietary counseling to children and families.                                                            | 5                     | 4            | 3                                 | 2               | 1                        |
| C. Primary care providers can be effective in treating childhood obesity.                                                                                    | 5                     | 4            | 3                                 | 2               | 1                        |
| D. It is the primary care provider’s role to counsel on healthy cooking strategies to children and families.                                                 | 5                     | 4            | 3                                 | 2               | 1                        |
| E. It is the primary care provider’s role to support and counsel on breastfeeding.                                                                           | 5                     | 4            | 3                                 | 2               | 1                        |
| F. It is the primary care provider’s role to identify community resources that exist for children who are overweight or obese.                               | 5                     | 4            | 3                                 | 2               | 1                        |
| G. It is the primary care provider’s role to counsel families on the benefits of cooking as it relates to emotional, physical and social well-being.         | 5                     | 4            | 3                                 | 2               | 1                        |
| H. It is the primary care provider’s role to collaborate with WIC centers to promote healthy eating strategies for young children.                           | 5                     | 4            | 3                                 | 2               | 1                        |
| I. It is the primary care provider’s role to identify and learn the federal, state, and local food policies that influence eating for children and families. | 5                     | 4            | 3                                 | 2               | 1                        |

**“Confidence in Obesity Knowledge”**

| <b>I feel confident in my knowledge to:</b>                                  | <b>Strongly Agree</b> | <b>Agree</b> | <b>Neither Agree nor Disagree</b> | <b>Disagree</b> | <b>Strongly Disagree</b> |
|------------------------------------------------------------------------------|-----------------------|--------------|-----------------------------------|-----------------|--------------------------|
| A. Describe the prevalence of childhood obesity and overweight by age group. | 5                     | 4            | 3                                 | 2               | 1                        |
| B. Describe the prevalence of childhood obesity by race/ethnic group.        | 5                     | 4            | 3                                 | 2               | 1                        |

|                                                                                                                                                 |   |   |   |   |   |
|-------------------------------------------------------------------------------------------------------------------------------------------------|---|---|---|---|---|
| C. Discuss with patients the American Academy of Pediatrics' recommendations for breastfeeding mothers.                                         | 5 | 4 | 3 | 2 | 1 |
| D. Discuss with patients evidence-based nutrition related recommendations to prevent childhood overweight and obesity.                          | 5 | 4 | 3 | 2 | 1 |
| E. Discuss with patients evidence based dietary guidelines for specific weight related comorbidities.                                           | 5 | 4 | 3 | 2 | 1 |
| F. Identify age-specific promoters and detractors of healthy eating in childcare, school, and university settings.                              | 5 | 4 | 3 | 2 | 1 |
| G. Define food literacy and discuss the determinants of food literacy.                                                                          | 5 | 4 | 3 | 2 | 1 |
| H. Discuss federal, state and local nutrition/food policies that influence eating for children and families.                                    | 5 | 4 | 3 | 2 | 1 |
| I. Discuss how implicit weight bias can influence your own and others physical, emotional and social wellbeing.                                 | 5 | 4 | 3 | 2 | 1 |
| J. Define food insecurity and discuss the determinants of food insecurity.                                                                      | 5 | 4 | 3 | 2 | 1 |
| K. Identify the association between decreased sleep, physical activity, and other daily routines and obesity risk in children and young adults. | 5 | 4 | 3 | 2 | 1 |

**"Confidence in Counseling Families about Obesity"**

| <b>I feel confident in my abilities to:</b>                                                                                             | <b>Strongly Agree</b> | <b>Agree</b> | <b>Neither Agree nor Disagree</b> | <b>Disagree</b> | <b>Strongly Disagree</b> |
|-----------------------------------------------------------------------------------------------------------------------------------------|-----------------------|--------------|-----------------------------------|-----------------|--------------------------|
| A. Make a difference in my patients' diet and eating habits.                                                                            | 5                     | 4            | 3                                 | 2               | 1                        |
| B. Counsel my patients using open- ended questions.                                                                                     | 5                     | 4            | 3                                 | 2               | 1                        |
| C. Counsel families on age-specific parenting skills to help support target behaviors around patient diet/eating and physical activity. | 5                     | 4            | 3                                 | 2               | 1                        |

|                                                                                                                  |   |   |   |   |   |
|------------------------------------------------------------------------------------------------------------------|---|---|---|---|---|
| D. Know what community resources exist for children who are overweight or obese.                                 | 5 | 4 | 3 | 2 | 1 |
| E. Counsel families using evidence based dietary guidelines for specific weight related comorbidities.           | 5 | 4 | 3 | 2 | 1 |
| F. Use motivational interviewing to influence eating habits and behaviors.                                       | 5 | 4 | 3 | 2 | 1 |
| G. Counsel on how to use cooking strategies to engage the whole family in behavior changes related to nutrition. | 5 | 4 | 3 | 2 | 1 |
| H. Counsel on the benefits of cooking as it relates to family food literacy.                                     | 5 | 4 | 3 | 2 | 1 |
| I. Counsel families on age-specific hunger and satiety regulation.                                               | 5 | 4 | 3 | 2 | 1 |
| J. Counsel on the benefits of cooking as it relates to emotional, physical and social well-being.                | 5 | 4 | 3 | 2 | 1 |
| K. Screen and assess common mental health conditions associated with childhood obesity.                          | 5 | 4 | 3 | 2 | 1 |
